# Supplementary material
Source: publisher site journal article supplement (https://static.cambridge.org/content/id/urn:cambridge.org:id:article:S0899823X22001519/resource/name/S0899823X22001519supp001.docx)
Supplement: Supplementary file 1 [file S0899823X22001519supp001.docx]

**Appendix A: Antimicrobial Spectrum Scoring**

| Dicloxacillin | 1 | Daptomycin | 5 |
| --- | --- | --- | --- |
| Nafcillin | 1 | Demeclocycline | 5 |
| Nitrofurantoin | 1 | Doxycycline | 5 |
| Oxacillin | 1 | Gentamicin | 5 |
| Amoxicillin | 2 | Minocycline | 5 |
| Ampicillin | 2 | Oritavancin | 5 |
| Cephalexin | 2 | Polymyxin B | 5 |
| Erythromycin | 2 | Telavancin | 5 |
| Metronidazole | 2 | Tetracycline | 5 |
| Penicillin G | 2 | Tobramycin | 5 |
| Penicillin V | 2 | Vancomycin | 5 |
| Aztreonam | 3 | Amikacin | 6 |
| Cefazolin | 3 | Amoxicillin with Clavulanate | 6 |
| Cefdinir | 3 | Ampicillin with Sulbactam | 6 |
| Cefixime | 3 | Cefepime | 6 |
| Cefprozil | 3 | Linezolid | 6 |
| Rifabutin | 3 | Tedizolid | 6 |
| Rifampin | 3 | Cefiderocol | 7 |
| Azithromycin | 4 | Ceftaroline | 8 |
| Ceftazidime | 4 | Ciprofloxacin | 8 |
| Chloramphenicol | 4 | Fosfomycin | 8 |
| Clarithromycin | 4 | Omadacycline | 8 |
| Clindamycin | 4 | Piperacillin with Tazobactam | 8 |
| Sulfamethoxazole with Trimethoprim | 4 | Ertapenem | 9 |
| Cefaclor | 5 | Levofloxacin | 9 |
| Cefadroxil | 5 | Ceftazidime/Avibactam | 10 |
| Cefotaxime | 5 | Ceftolozane/Tazobactam | 10 |
| Cefotetan | 5 | Meropenem | 10 |
| Cefoxitin | 5 | Moxifloxacin | 10 |
| Cefpodoxime | 5 | Delafloxacin | 11 |
| Ceftriaxone | 5 | Doripenem | 11 |
| Cefuroxime | 5 | Imipenem with Cilastatin | 11 |
| Colistin | 5 | Meropenem/Vaborbactam | 11 |
| Dalbavancin | 5 | Tigecycline | 13 |
